# Supplementary material for: K7B2P5O19: a novel alkali metal borophosphate with zero dimensional [B2P5O19]7− anionic units
Source: Royal Society of Chemistry journal article supplement (doi:10.1039/c4ce00917g), 2014-01-01
Supplement: c4ce00917g1.pdf [file c4ce00917g1.pdf]

Electronic Supplementary Information (ESI)

---

**K<sub>7</sub>B<sub>2</sub>P<sub>5</sub>O<sub>19</sub>: A Novel Alkali Metal Borophosphate with Zero Dimensional [B<sub>2</sub>P<sub>5</sub>O<sub>19</sub>]<sup>7-</sup> Anionic Units†**

Ying Wang,<sup>a,b</sup> Shilie Pan,<sup>\*a</sup> Shujuan Han,<sup>a</sup> Bingbing Zhang,<sup>a,b</sup> Lingyun Dong,<sup>a,b</sup> Min Zhang<sup>a</sup> and Zhihua Yang<sup>a</sup>

<sup>a</sup> *Key Laboratory of Functional Materials and Devices for Special Environments of CAS, Xinjiang Technical Institute of physics & Chemistry of CAS, Xinjiang Key Laboratory of Electronic Information Materials and Devices, 40–1 South Beijing Road, Urumqi 830011, China*

<sup>b</sup> *University of Chinese Academy of Sciences, Beijing 100049, China*

*\* To whom correspondence should be addressed*

*E-mail: slpan@ms.xjb.ac.cn (Shilie Pan) Tel: (86)-991-3674558 Fax: (86)-991-3838957*

## Equipment

Powder XRD data were collected on a Bruker D2 PHASER diffractometer with Cu K $\alpha$  radiation ( $\lambda = 1.5418 \text{ \AA}$ ) at room temperature. The  $2\theta$  range was 5-70° with a step size of 0.02° and a fixed counting time of 1 s/step. Vibrational spectra were obtained at room temperature via a Shimadzu IR Affinity-1 Fourier transform infrared spectrometer in a range from 400 to 4000  $\text{cm}^{-1}$  with a resolution of 4  $\text{cm}^{-1}$  (5 mg of the sample, 500 mg of KBr). The UV-Vis-NIR optical diffuse reflectance spectrum was measured at room temperature with a Shimadzu SolidSpec-3700DUV spectrophotometer in the wavelength range 190 – 2600 nm. The reflectance spectrum was converted to absorbance with the Kubelka–Munk function.<sup>S1</sup> Thermal analysis was carried out on NETZSCH STA 449C instrument at a temperature range of 50 - 900 °C with a heating rate of 10 °C /min in an atmosphere of flowing N<sub>2</sub>.

## Computational Details

First-principles density functional theory (DFT) electronic structure calculations for the two compounds were performed with the total-energy code CASTEP.<sup>S2</sup> The exchange-correlation effects were treated with the general gradient approximation (GGA) using Perdew-Burke-Emzerhoff (PBE) functional.<sup>S3</sup> The interactions between the ionic cores and the electrons were described by the Norm-conserving pseudopotentials.<sup>S4</sup> The Monkhorst–Pack scheme  $k$ -points grid sampling was set at 3×3×2 in the primitive cell of the Brillouin zone (BZ) for the total energy calculations. The plane-wave cutoff energy was set to 750.0 eV, which was proven to be an optimal level of the total energy convergence. The following orbital electrons were treated as valence electrons: K, 3s<sup>2</sup>3p<sup>6</sup>4s<sup>1</sup>, B, 2s<sup>2</sup>2p<sup>1</sup>, P, 3s<sup>2</sup>3p<sup>3</sup>, and O, 2s<sup>2</sup>2p<sup>4</sup>. The other parameters used in the calculations were set by the default values of the CASTEP code.

S1(a) J. Tauc, *Mater. Res. Bull.*, 1970, **5**, 721; (b) P. Kubelka and F. Z. Munk, *Tech. Phys.*, 1931, **12**, 593.

S2 (a)M. D. Segall, P. J. D. Lindan, M. J. Probert, C. J. Pickard, P. J. Hasnip, S. J. Clark, M. C. Payne, *J. Phys.: Condens. Matter* 2002, **14**, 2717. (b)V. Milman, B. Winkler, J. A. White, C. J. Pickard, M. C. Payne, E. V. Akhmatkaya, R. H. Nobes, *Int. J. Quantum Chem.* 2000, **77**, 895.

S3 J. P. Perdew, K. Burke, M. Ernzerhof, *Phys. Rev. Lett.* 1996, **77**, 3865.

S4 J. S. Lin, A. Qteish, M. C. Payne, V. Heine, *Phys. Rev. B* 1993, **47**, 4174.

**Table S1.** Atomic Coordinates, Equivalent Isotropic Displacement Parameters ( $\text{\AA}^2$ ) and Bond Valence Sums for  $\text{K}_7\text{B}_2\text{P}_5\text{O}_{19}$ .

| Atom  | <i>Wyck.</i> | S.O.F. | <i>x/a</i> | <i>y/b</i> | <i>z/c</i> | $U_{\text{eq}}^a$ | $\Sigma V$ |
|-------|--------------|--------|------------|------------|------------|-------------------|------------|
| K(1)  | 2i           | 1      | 0.9718(1)  | 0.6345(1)  | -0.1195(1) | 0.0034(1)         | 1.02       |
| K(2)  | 2i           | 1      | 0.9344(1)  | 0.8618(1)  | 0.3826(1)  | 0.0036(1)         | 0.99       |
| K(3)  | 2i           | 1      | 0.7142(1)  | 0.0364(1)  | 0.2065(1)  | 0.0024(1)         | 1.23       |
| K(4)  | 1a           | 1      | 1          | 1          | 0          | 0.0033(1)         | 0.80       |
| K(5)  | 2i           | 1      | 0.4632(1)  | 0.2425(1)  | 0.0975(1)  | 0.0028(1)         | 1.14       |
| K(6)  | 2i           | 1      | 0.4452(1)  | 0.6165(1)  | 0.2029(1)  | 0.0031(1)         | 1.21       |
| K(7)  | 2i           | 1      | 0.7508(1)  | 0.2684(1)  | 0.5023(1)  | 0.0038(1)         | 0.86       |
| K(8)  | 2i           | 0.495  | 0.5623(2)  | 0.5100(2)  | 0.4791(2)  | 0.0035(1)         | 1.00       |
| B(1)  | 2i           | 1      | 0.7068(4)  | 0.0161(4)  | 0.7153(3)  | 0.0018(1)         | 3.05       |
| B(2)  | 2i           | 1      | 0.9228(4)  | 0.2817(4)  | 0.7967(3)  | 0.0019(1)         | 3.08       |
| P(1)  | 2i           | 1      | 0.7729(1)  | 0.6590(1)  | 0.1032(1)  | 0.0020(1)         | 5.13       |
| P(2)  | 2i           | 1      | 0.3075(1)  | 0.8505(1)  | 0.0956(1)  | 0.0018(1)         | 4.80       |
| P(3)  | 2i           | 1      | 0.8401(1)  | 0.4915(1)  | 0.2851(1)  | 0.0024(1)         | 4.95       |
| P(4)  | 2i           | 1      | 0.6550(1)  | 0.8837(1)  | 0.4981(1)  | 0.0020(1)         | 4.81       |
| P(5)  | 2i           | 1      | 0.2017(1)  | 0.1997(1)  | 0.2922(1)  | 0.0019(1)         | 4.97       |
| O(1)  | 2i           | 1      | 0.1794(3)  | 0.7019(2)  | 0.1354(2)  | 0.0021(1)         | 2.00       |
| O(2)  | 2i           | 1      | 0.2265(3)  | 0.9051(3)  | 0.0039(2)  | 0.0026(1)         | 1.98       |
| O(3)  | 2i           | 1      | 0.3895(2)  | 0.9677(2)  | 0.2128(2)  | 0.0018(1)         | 2.03       |
| O(4)  | 2i           | 1      | 0.4274(3)  | 0.8179(3)  | 0.0660(2)  | 0.0027(1)         | 2.08       |
| O(5)  | 2i           | 1      | 0.5165(3)  | 0.7476(3)  | 0.4256(2)  | 0.0033(1)         | 2.15       |
| O(6)  | 2i           | 1      | 0.7342(4)  | 0.7668(3)  | 0.1523(3)  | 0.0046(1)         | 1.96       |
| O(7)  | 2i           | 1      | 0.9518(3)  | 0.7289(3)  | 0.1172(3)  | 0.0040(1)         | 2.10       |
| O(8)  | 2i           | 1      | 0.6942(4)  | 0.5966(5)  | -0.0202(3) | 0.0072(1)         | 1.96       |
| O(9)  | 2i           | 1      | 0.7315(3)  | 0.5249(4)  | 0.1813(3)  | 0.0065(1)         | 2.17       |
| O(10) | 2i           | 1      | 0.2467(3)  | 0.0947(3)  | 0.2320(2)  | 0.0028(1)         | 2.10       |
| O(11) | 2i           | 1      | 0.2239(3)  | 0.1664(3)  | 0.4278(2)  | 0.0027(1)         | 2.20       |
| O(12) | 2i           | 1      | 0.3117(4)  | 0.3595(3)  | 0.2892(3)  | 0.0052(1)         | 2.17       |
| O(13) | 2i           | 1      | 0.0330(3)  | 0.1475(4)  | 0.2469(3)  | 0.0043(1)         | 1.95       |
| O(14) | 2i           | 1      | 0.7577(3)  | 0.0054(3)  | 0.4361(2)  | 0.0029(1)         | 1.95       |
| O(15) | 2i           | 1      | 0.8391(3)  | 0.1561(3)  | 0.7066(2)  | 0.0027(1)         | 2.07       |
| O(16) | 2i           | 1      | 0.6040(3)  | 0.9427(2)  | 0.5956(2)  | 0.0021(1)         | 1.99       |
| O(17) | 2i           | 1      | 0.8439(5)  | 0.5595(4)  | 0.3983(3)  | 0.0072(1)         | 1.81       |
| O(18) | 2i           | 1      | 0.0044(3)  | 0.5746(3)  | 0.2540(2)  | 0.0026(1)         | 2.09       |
| O(19) | 2i           | 1      | 0.7768(3)  | 0.3271(3)  | 0.2675(2)  | 0.0032(1)         | 1.99       |

**Table S2.** Selected Bond Distances (Å) and Angles (deg) for  $K_7B_2P_5O_{19}$ .

|              |          |               |          |
|--------------|----------|---------------|----------|
| K(1)-O(13)#1 | 2.712(3) | K(7)-O(14)    | 2.811(3) |
| K(1)-O(18)#1 | 2.754(3) | K(7)-O(15)    | 2.834(3) |
| K(1)-O(2)#2  | 2.793(3) | K(7)-O(19)    | 2.858(3) |
| K(1)-O(7)    | 2.989(3) | K(7)-O(5)#10  | 2.888(3) |
| K(1)-O(1)#3  | 2.993(2) | K(7)-O(17)    | 3.014(4) |
| K(1)-O(8)    | 3.073(4) | K(7)-O(16)#10 | 3.073(2) |
| K(1)-O(1)#2  | 3.121(3) | K(7)-O(18)#13 | 3.154(3) |
| K(1)-O(12)#1 | 3.143(3) | K(7)-O(16)    | 3.234(2) |
| K(1)-O(19)#1 | 3.204(3) |               |          |
|              |          | K(8)-O(5)#12  | 2.689(3) |
| K(2)-O(15)#5 | 2.750(3) | K(8)-O(5)     | 2.733(3) |
| K(2)-O(17)#6 | 2.785(3) | K(8)-O(12)#11 | 2.740(4) |
| K(2)-O(6)    | 2.842(3) | K(8)-O(12)#5  | 2.754(4) |
| K(2)-O(11)#5 | 2.913(3) | K(8)-O(17)#6  | 2.960(4) |
| K(2)-O(14)   | 2.920(3) | K(8)-O(11)#5  | 2.965(3) |
| K(2)-O(11)   | 2.997(3) |               |          |
| K(2)-O(14)#5 | 3.011(3) | B(1)-O(15)    | 1.428(4) |
| K(2)-O(13)   | 3.164(3) | B(1)-O(3)#10  | 1.459(4) |
|              |          | B(1)-O(16)    | 1.491(4) |
| K(3)-O(2)#7  | 2.658(2) | B(1)-O(10)#5  | 1.511(4) |
| K(3)-O(14)   | 2.683(3) |               |          |
| K(3)-O(13)   | 2.747(3) | B(2)-O(15)    | 1.420(5) |
| K(3)-O(19)   | 2.764(3) | B(2)-O(1)#10  | 1.477(4) |
| K(3)-O(4)    | 2.777(3) | B(2)-O(18)#13 | 1.485(4) |
| K(3)-O(6)    | 2.916(3) | B(2)-O(7)#5   | 1.490(5) |
| K(3)-O(3)    | 2.986(2) |               |          |
|              |          | P(1)-O(8)     | 1.462(3) |
| K(4)-O(2)#7  | 2.847(2) | P(1)-O(6)     | 1.469(3) |
| K(4)-O(2)#2  | 2.847(2) | P(1)-O(7)     | 1.543(3) |
| K(4)-O(7)#1  | 2.979(2) | P(1)-O(9)     | 1.590(3) |
| K(4)-O(7)    | 2.979(2) |               |          |
| K(4)-O(10)   | 3.051(3) | P(2)-O(4)     | 1.484(2) |
| K(4)-O(10)#1 | 3.051(3) | P(2)-O(2)     | 1.490(3) |
| K(4)-O(13)   | 3.113(3) | P(2)-O(3)     | 1.590(2) |
| K(4)-O(13)#1 | 3.113(3) | P(2)-O(1)     | 1.597(2) |
|              |          |               |          |
| K(5)-O(4)#7  | 2.582(3) | P(3)-O(17)    | 1.468(3) |
| K(5)-O(10)#8 | 2.781(3) | P(3)-O(19)    | 1.472(2) |
| K(5)-O(9)#9  | 2.803(3) | P(3)-O(18)    | 1.567(2) |
| K(5)-O(8)#7  | 2.816(4) | P(3)-O(9)#9   | 1.615(3) |
| K(5)-O(3)    | 2.960(2) |               |          |
| K(5)-O(19)   | 3.058(3) | P(4)-O(5)     | 1.483(3) |

**Electronic Supplementary Information (ESI)**

---

|                       |            |                    |            |
|-----------------------|------------|--------------------|------------|
| K(5)-O(2)             | 3.102(3)   | P(4)-O(14)         | 1.491(3)   |
| K(5)-O(6)#7           | 3.152(3)   | P(4)-O(16)         | 1.556(2)   |
| K(5)-O(12)#8          | 3.424(4)   | P(4)-O(11)#5       | 1.632(3)   |
| K(6)-O(12)#11         | 2.634(3)   | P(5)-O(12)         | 1.469(3)   |
| K(6)-O(8)#3           | 2.637(3)   | P(5)-O(13)         | 1.473(3)   |
| K(6)-O(4)             | 2.678(3)   | P(5)-O(10)         | 1.550(2)   |
| K(6)-O(5)             | 2.700(3)   | P(5)-O(11)         | 1.623(3)   |
| K(6)-O(6)             | 2.736(3)   |                    |            |
| K(6)-O(1)             | 3.134(2)   | O(17)-P(3)-O(19)   | 117.66(18) |
|                       |            | O(17)-P(3)-O(18)   | 111.44(19) |
| O(15)-B(1)-O(3)#10    | 113.5(3)   | O(19)-P(3)-O(18)   | 110.06(15) |
| O(15)-B(1)-O(16)      | 109.7(3)   | O(17)-P(3)-O(9)#9  | 108.6(2)   |
| O(3)#10-B(1)-O(16)    | 107.6(3)   | O(19)-P(3)-O(9)#9  | 105.60(18) |
| O(15)-B(1)-O(10)#5    | 112.8(3)   | O(18)-P(3)-O(9)#9  | 102.16(14) |
| O(3)#10-B(1)-O(10)#5  | 106.2(3)   |                    |            |
| O(16)-B(1)-O(10)#5    | 106.7(3)   | O(5)-P(4)-O(14)    | 118.10(16) |
|                       |            | O(5)-P(4)-O(16)    | 109.46(15) |
| O(15)-B(2)-O(1)#10    | 112.9(3)   | O(14)-P(4)-O(16)   | 113.41(14) |
| O(15)-B(2)-O(18)#13   | 110.9(3)   | O(5)-P(4)-O(11)#5  | 108.61(15) |
| O(1)#10-B(2)-O(18)#13 | 104.9(3)   | O(14)-P(4)-O(11)#5 | 102.36(15) |
| O(15)-B(2)-O(7)#5     | 111.9(3)   | O(16)-P(4)-O(11)#5 | 103.53(13) |
| O(1)#10-B(2)-O(7)#5   | 107.0(3)   |                    |            |
| O(18)#13-B(2)-O(7)#5  | 108.9(3)   | O(12)-P(5)-O(13)   | 116.85(19) |
|                       |            | O(12)-P(5)-O(10)   | 111.50(18) |
| O(8)-P(1)-O(6)        | 115.2(2)   | O(13)-P(5)-O(10)   | 109.75(16) |
| O(8)-P(1)-O(7)        | 108.5(2)   | O(12)-P(5)-O(11)   | 108.45(16) |
| O(6)-P(1)-O(7)        | 111.38(18) | O(13)-P(5)-O(11)   | 106.55(16) |
| O(8)-P(1)-O(9)        | 109.3(2)   | O(10)-P(5)-O(11)   | 102.65(13) |
| O(6)-P(1)-O(9)        | 108.5(2)   |                    |            |
| O(7)-P(1)-O(9)        | 103.42(15) |                    |            |
| O(4)-P(2)-O(2)        | 117.85(15) |                    |            |
| O(4)-P(2)-O(3)        | 107.29(14) |                    |            |
| O(2)-P(2)-O(3)        | 110.09(13) |                    |            |
| O(4)-P(2)-O(1)        | 107.93(13) |                    |            |
| O(2)-P(2)-O(1)        | 109.36(13) |                    |            |
| O(3)-P(2)-O(1)        | 103.33(12) |                    |            |

---

Symmetry transformations used to generate equivalent atoms:

#1 -x+2,-y+2,-z; #2 x+1,y,z; #3 -x+1,-y+1,-z; #4 x,y-1,z-1; #5 -x+2,-y+2,-z+1; #6 x,y-1,z;  
#7 -x+1,-y+2,-z; #8 x-1,y,z; #9 x,y+1,z; #10 -x+1,-y+2,-z+1; #11 x-1,y-1,z; #12 -x+1,-y+1,-z+1;  
#13 -x+2,-y+3,-z+1; #14 x,y+1,z+1; #15 x+1,y+1,z

**Table S3.** Structure Table for the Known Borophosphates Containing P-O-P Connection.

| compound                                                                                            | space group             | FBU                                                                 | anionic partial structures                                                                | ref |
|-----------------------------------------------------------------------------------------------------|-------------------------|---------------------------------------------------------------------|-------------------------------------------------------------------------------------------|-----|
| Cs <sub>2</sub> Cr <sub>3</sub> (BP <sub>4</sub> O <sub>14</sub> )(P <sub>4</sub> O <sub>13</sub> ) | <i>P2<sub>1</sub>/c</i> | [B(P <sub>2</sub> O <sub>7</sub> ) <sub>2</sub> ] <sup>5-</sup>     | [B(P <sub>2</sub> O <sub>7</sub> ) <sub>2</sub> ] <sub>n</sub> <sup>5n-</sup> chains (1D) | 5   |
| CsFeBP <sub>3</sub> O <sub>11</sub>                                                                 | <i>Pnma</i>             | [B(PO <sub>4</sub> )(P <sub>2</sub> O <sub>7</sub> )] <sup>4-</sup> | [BP <sub>3</sub> O <sub>11</sub> ] <sub>n</sub> <sup>4n-</sup> framework (3D)             | 5   |
| Li <sub>2</sub> Cs <sub>2</sub> B <sub>2</sub> P <sub>4</sub> O <sub>15</sub>                       | <i>P</i>                | [B <sub>4</sub> P <sub>8</sub> O <sub>30</sub> ] <sup>8-</sup>      | [B <sub>2</sub> P <sub>4</sub> O <sub>15</sub> ] <sub>n</sub> <sup>4n-</sup> layer (2D)   | 6   |
| Li <sub>3</sub> K <sub>2</sub> BP <sub>4</sub> O <sub>14</sub>                                      | <i>Cmca</i>             | [B(P <sub>2</sub> O <sub>7</sub> ) <sub>2</sub> ] <sup>5-</sup>     | [B(P <sub>2</sub> O <sub>7</sub> ) <sub>2</sub> ] <sub>n</sub> <sup>5n-</sup> layer (2D)  | 6   |
| Li <sub>3</sub> Rb <sub>2</sub> BP <sub>4</sub> O <sub>14</sub>                                     | <i>Cmca</i>             | [B(P <sub>2</sub> O <sub>7</sub> ) <sub>2</sub> ] <sup>5-</sup>     | [B(P <sub>2</sub> O <sub>7</sub> ) <sub>2</sub> ] <sub>n</sub> <sup>5n-</sup> layer (2D)  | 6   |

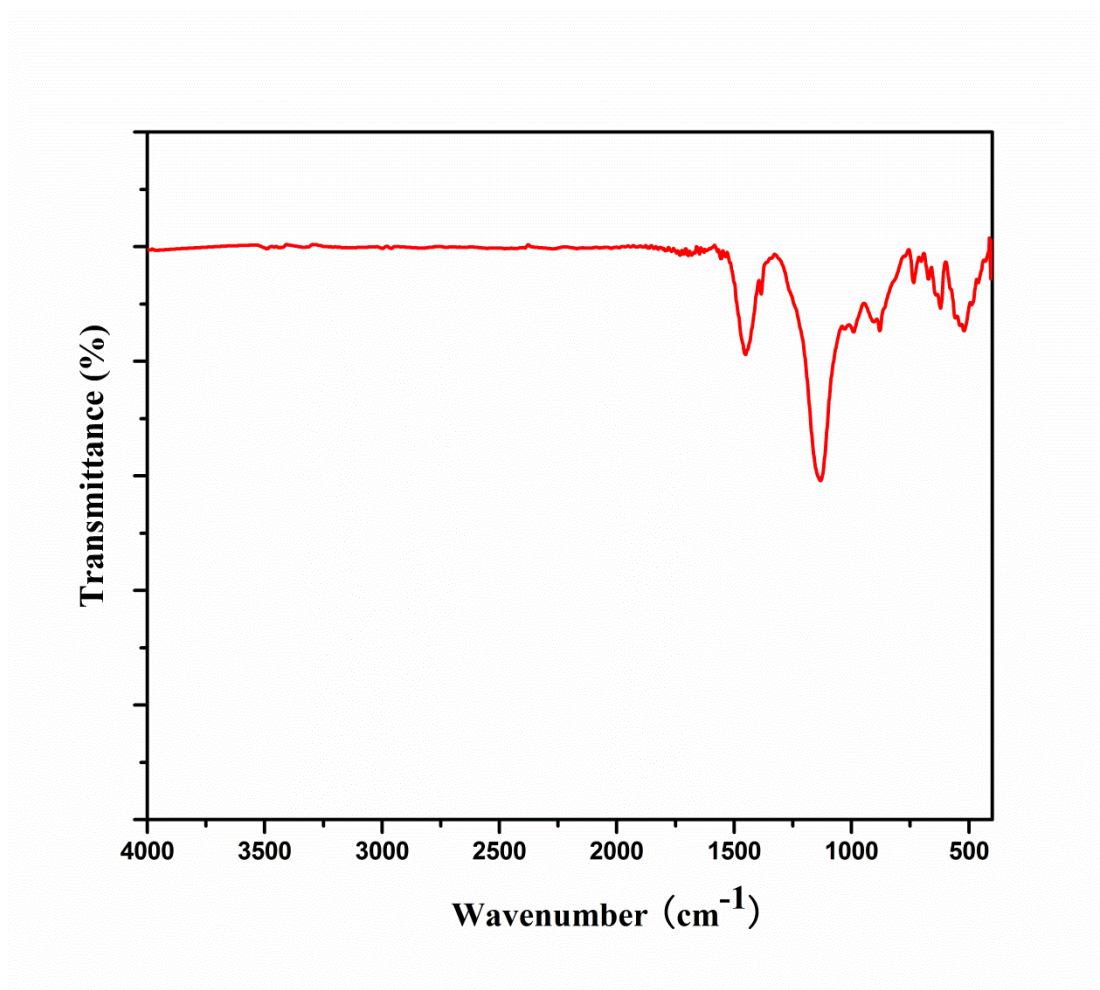

Figure S1. IR spectroscopy of  $K_7B_2P_5O_{19}$ .



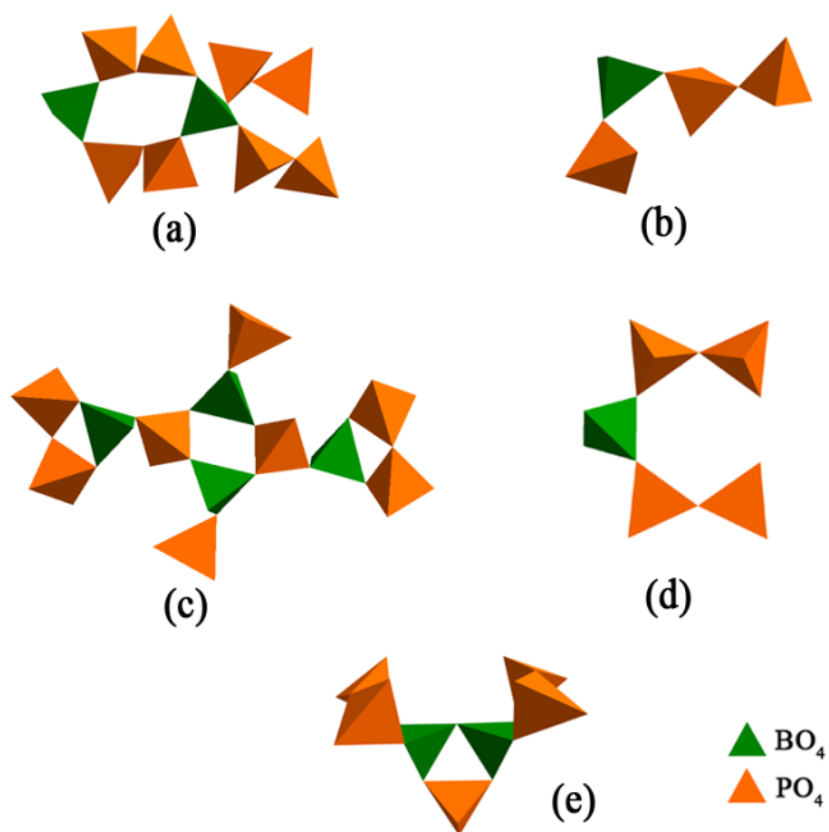

**Figure S2.** View of four different kinds of FBUs with P-O-P connections: (a)  $[\text{B}(\text{P}_2\text{O}_7)_2]^{5-}$  unit with B:P=1:4; (b)  $[\text{B}(\text{PO}_4)(\text{P}_2\text{O}_7)]^{4-}$  unit with B:P =1:3; (c)  $[\text{B}_4\text{P}_8\text{O}_{30}]^{8-}$  unit with B:P = 1:2 (d) another kind of  $[\text{B}(\text{P}_2\text{O}_7)_2]^{5-}$  unit with B:P=1:4 and (e)  $[\text{B}_2\text{P}_5\text{O}_{19}]^{7-}$  unit with B:P =2:5.

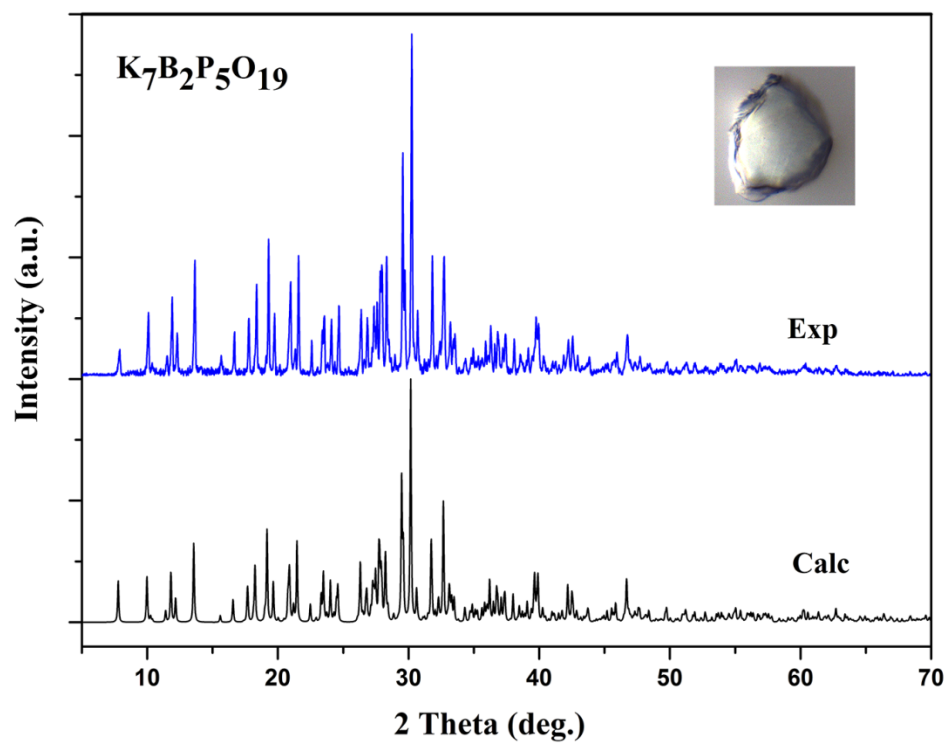

**Figure S3.** Powder XRD pattern of  $K_7B_2P_5O_{19}$  (the inner figure shows the crystal for single crystal determination).

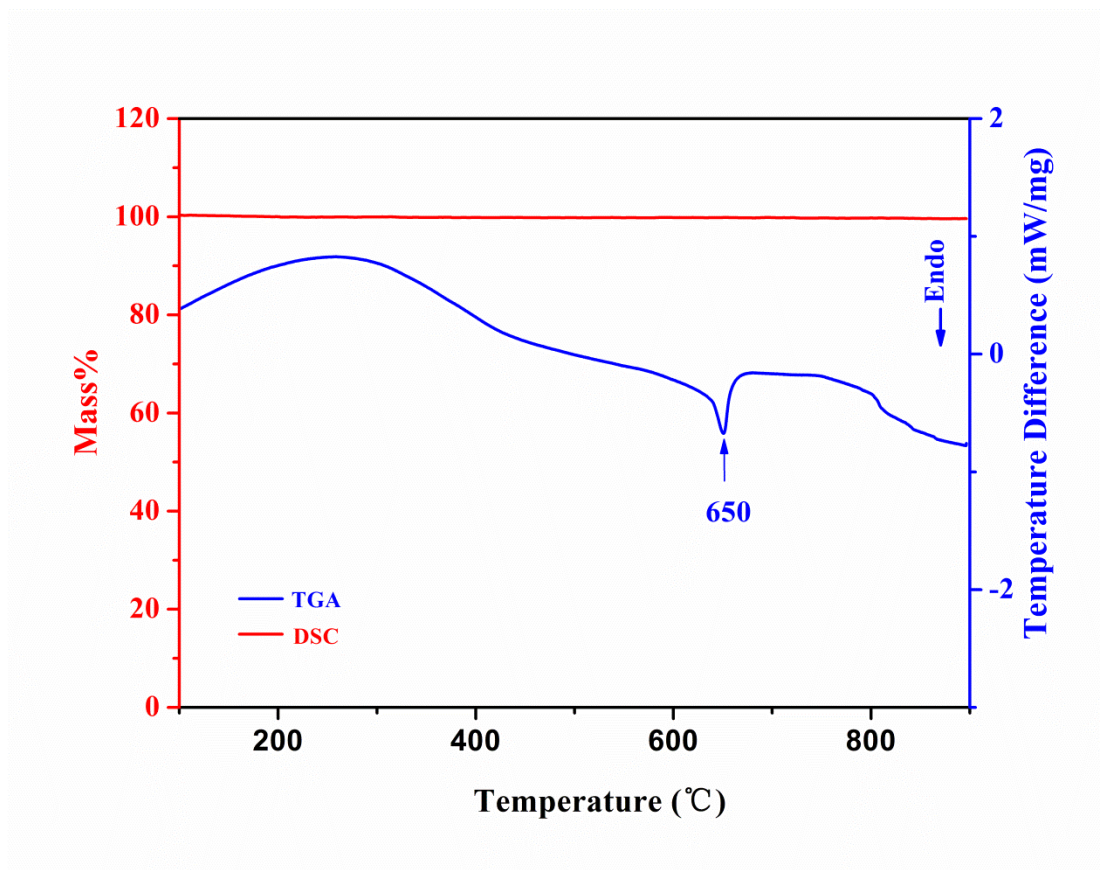

**Figure S4.** Thermal behaviour of  $K_7B_2P_5O_{19}$  (thermal gravimetric analysis: red curve; differential scanning calorimetry: blue curve).

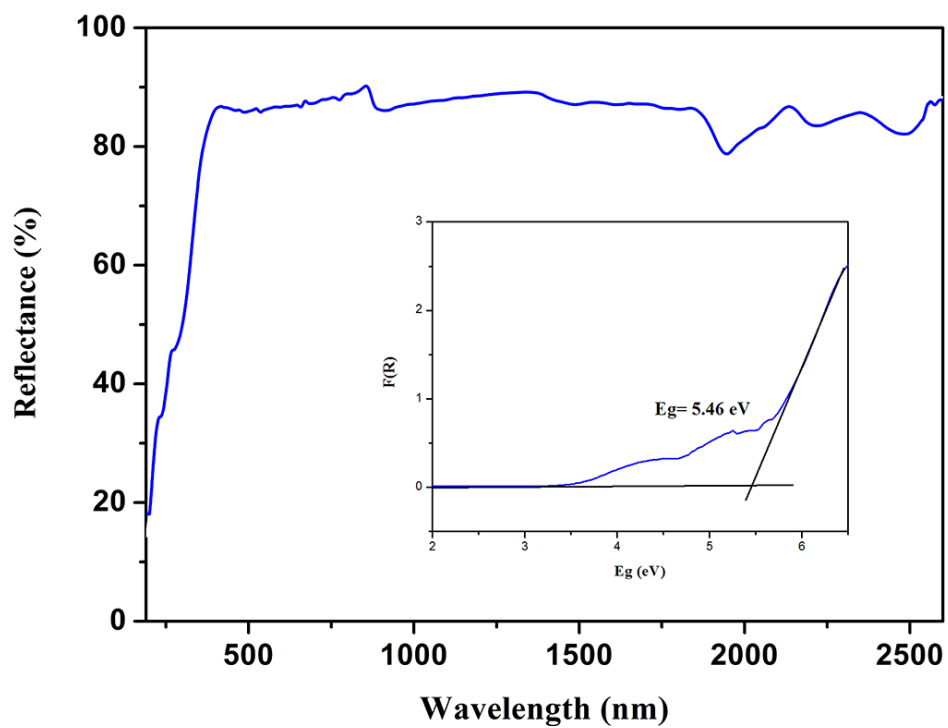

**Figure S5.** UV-vis-NIR diffuse reflectance spectroscopy of  $K_7B_2P_5O_{19}$ .

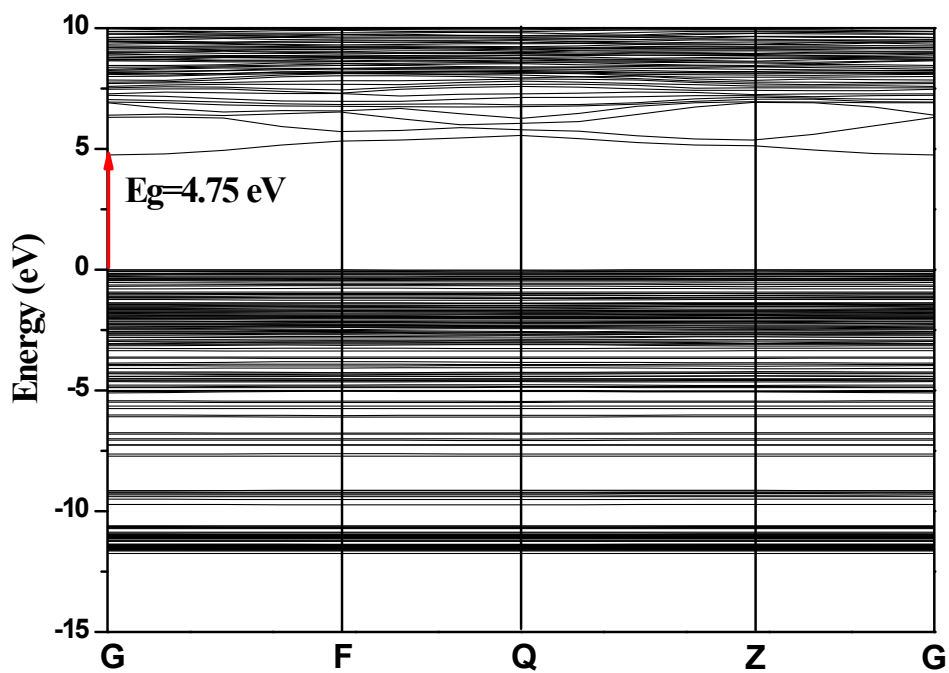

Figure S6. Band structure of  $K_7B_2P_5O_{19}$ .

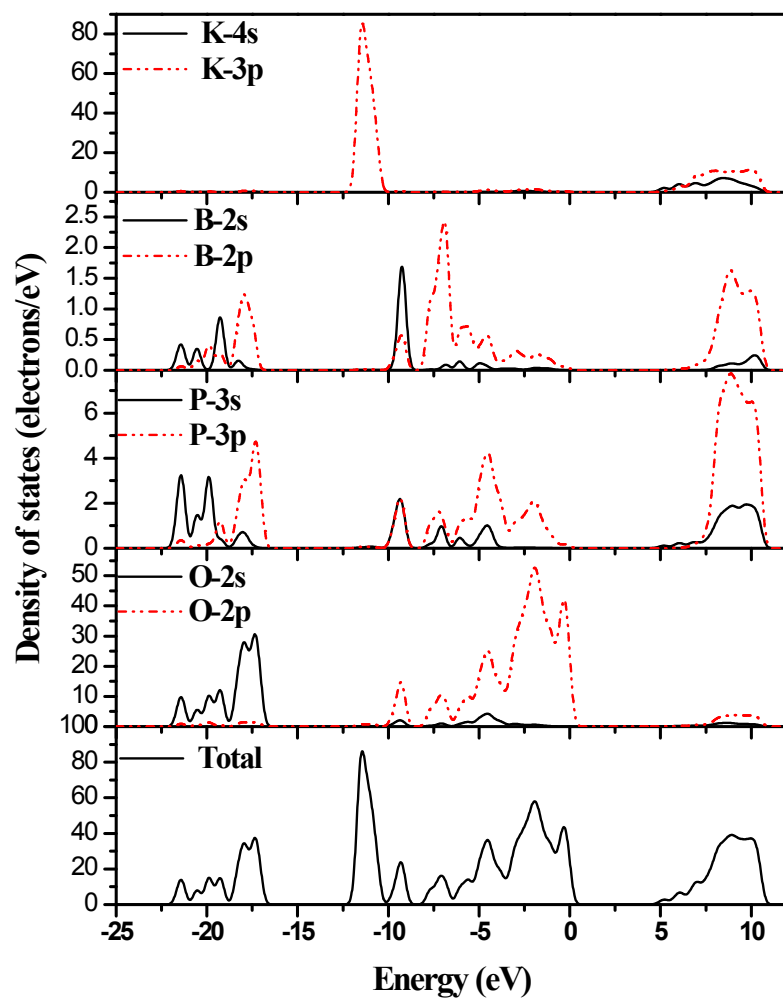

Figure S7. Density of states of  $K_7B_2P_5O_{19}$ .
